# Supplementary material for: Psychometrics of the Korean Version of the screen for adult anxiety related disorders (SCAARED)
Source: PubMed Central journal article supplement (PMC11137947; doi:10.1186/s12888-024-05800-5), 2024-05-30
Supplement: 12888_2024_5800_MOESM1_ESM.pdf [file 12888_2024_5800_MOESM1_ESM.pdf]

## ***Factor analysis with principal component analysis***

The factor structures derived from the principal component analysis (PCA) and the principal-axis factoring (PAF) analysis in our study were mostly consistent, with the exception of four items (items 12, 18, 28, and 41) being allocated to different factors, as detailed in Supplementary Table 1.

**Supplementary Table 1. Factor analysis for the four-factor solution of the Korean version of the SCAARED (PCA method)**

|                                                              | Factor I            | Factor II                 | Factor III     | Factor IV          |
|--------------------------------------------------------------|---------------------|---------------------------|----------------|--------------------|
| Item                                                         | Generalized anxiety | Somatic/Panic/agoraphobia | Social anxiety | Separation anxiety |
| 08. It is hard for me to stop worrying                       | 0.788               |                           |                |                    |
| 23. I am a worrier                                           | 0.750               |                           |                |                    |
| 21. I worry about things working out for me                  | 0.730               |                           |                |                    |
| 39. I worry about things that have already happened          | 0.698               |                           |                |                    |
| 31. When I worry a lot, I feel restless                      | 0.684               |                           |                |                    |
| 37. I worry about how well I do things                       | 0.670               | 0.333                     |                |                    |
| 07. I am nervous                                             | 0.664               |                           |                |                    |
| 29. People tell me that I worry too much                     | 0.642               |                           |                |                    |
| 14. I worry about being as good as other people              | 0.626               |                           |                |                    |
| 35. I worry about what is going to happen in the future      | 0.618               |                           |                |                    |
| 09. People tell me that I look nervous                       | 0.585               |                           | 0.321          |                    |
| 05. I worry about people liking me                           | 0.575               |                           | 0.350          |                    |
| 24. When I worry a lot, I have trouble sleeping              | 0.538               |                           |                |                    |
| 44. When I worry a lot, I feel irritable.                    | 0.499               | 0.363                     |                |                    |
| 12. When I get anxious, I feel like I'm going crazy          | 0.485               | 0.429                     |                |                    |
| 28. When I get anxious, I feel like I'm choking              | 0.455               | 0.454                     |                |                    |
| 41. I feel nervous when I am with other people and I have to | 0.428               |                           | 0.418          |                    |

---

|                                                                                                                    |       |       |       |
|--------------------------------------------------------------------------------------------------------------------|-------|-------|-------|
| do something while they watch me (for example: speak,<br>play a sport)                                             |       |       |       |
| 40. When I get anxious, I feel dizzy                                                                               |       | 0.676 |       |
| 06. When I get anxious, I feel like passing out                                                                    |       | 0.652 |       |
| 11. I get stomachaches at school, at work, or in public<br>places                                                  |       | 0.605 |       |
| 15. When I get anxious, I feel like things are not real                                                            | 0.314 | 0.568 |       |
| 02. I get headaches when I am at school, at work or in<br>public places                                            |       | 0.547 |       |
| 01. When I feel nervous, It is hard for me to breathe                                                              | 0.363 | 0.547 |       |
| 36. When I get anxious, I feel like throwing up                                                                    | 0.306 | 0.515 |       |
| 25. I get really frightened for no reason at all                                                                   | 0.369 | 0.514 |       |
| 17. I worry about going to work or school, or to public<br>places                                                  |       | 0.459 | 0.339 |
| 32. I am afraid of having anxiety (or panic) attacks                                                               |       | 0.446 |       |
| 22. When I get anxious, I sweat a lot                                                                              |       | 0.440 | 0.356 |
| 18. When I get anxious, my heart beats fast                                                                        |       | 0.392 | 0.365 |
| 42. I feel nervous when I go to parties, dances, or any place<br>where there will be people that I don't know well |       |       | 0.786 |
| 27. It is hard for me to talk with people I don't know well                                                        |       |       | 0.764 |
| 10. I feel nervous with people I don't know well                                                                   | 0.324 |       | 0.717 |

---

|                                                                  |       |       |       |       |
|------------------------------------------------------------------|-------|-------|-------|-------|
| 34. I feel shy with people I don't know well                     |       |       | 0.690 |       |
| 03. I don't like to be with people I don't know well             |       |       | 0.650 |       |
| 43. I am shy                                                     |       |       | 0.588 |       |
| 38. I am afraid to go outside or to crowded places by myself     |       | 0.417 | 0.483 |       |
| 33. I worry that something bad might happen to my family         | 0.329 |       |       | 0.617 |
| 16. I have nightmares about something bad happening to my family |       |       |       | 0.613 |
| 13. I worry about sleeping alone                                 |       |       |       | 0.609 |
| 30. I don't like to be away from my family                       |       |       |       | 0.590 |
| 04. I get nervous if I sleep away from home                      |       | 0.328 | 0.316 | 0.518 |
| 26. I am afraid to be alone in the house                         |       | 0.356 |       | 0.485 |
| 20. I have nightmares about something bad happening to me        | 0.376 |       |       | 0.391 |
| 19. I get shaky                                                  |       |       |       | 0.327 |
| Eigenvalue                                                       | 13.6  | 2.91  | 2.45  | 2.07  |
| % of variance                                                    | 30.9  | 6.60  | 6.67  | 4.70  |

PCA, principal component analysis; SCAARED, The Screen for Adult Anxiety Related Disorders; All loading greater than 0.30 are reported.

Factor I (Generalized anxiety): Items 5, 7, 8, 9, 12, 14, 21, 23, 24, 28, 29, 31, 35, 37, 39, 41, 44

Factor II (Somatic/Panic/Agoraphobia): Items 1, 2, 6, 11, 15, 17, 18, 22, 25, 32, 36, 40

Factor III (Social anxiety): Items 3, 10, 27, 34, 38, 42, 43

Factor IV (Separation anxiety): Items 4, 13, 16, 19, 20, 26, 30, 33
